# Supplementary material
Source: PubMed Central journal article supplement (PMC9007882)
Supplement: NIHMS1785713-supplement-Supplemental_Publication_Material.pdf [file NIHMS1785713-supplement-Supplemental_Publication_Material.pdf]

## **SUPPLEMENTAL MATERIAL**

### **Fetal Brain Volume Predicts Neurodevelopment in Congenital Heart Disease**

Supplemental Table 1. Cardiac Class, Diagnoses, and Cardiac Interventions for all CHD Participants

Supplemental Table 2. Alternative Hierarchical Regression Models to Predict Neurodevelopmental Outcomes in the CHD Group

Supplemental Table 3. Stepwise Forward Selection Regression Models to Predict Neurodevelopmental Outcomes in the CHD Group

**Supplemental Table 1. Cardiac Class,<sup>25</sup> Diagnoses, and Cardiac Interventions for all CHD Participants**

| <b>Cardiac Diagnosis</b>                                                   | <b>Cardiac Interventions</b>                                                                                                                                            |
|----------------------------------------------------------------------------|-------------------------------------------------------------------------------------------------------------------------------------------------------------------------|
| <b>Class I (Two ventricles with no aortic arch obstruction)</b>            |                                                                                                                                                                         |
| d-TGA/IVS                                                                  | 1. Arterial switch operation, PDA ligation, PFO closure                                                                                                                 |
| d-TGA/IVS                                                                  | 1. Balloon atrial septostomy<br>2. Arterial switch operation                                                                                                            |
| d-TGA/IVS                                                                  | 1. Arterial switch operation, ASD closure                                                                                                                               |
| d-TGA/IVS                                                                  | 1. Arterial switch operation, ASD closure, PDA ligation, pulmonary root reconstruction                                                                                  |
| d-TGA/IVS                                                                  | 1. Balloon atrial septostomy<br>2. Arterial switch operation, ASD closure, PDA ligation                                                                                 |
| d-TGA/VSD                                                                  | 1. Arterial switch operation, VSD and ASD closure                                                                                                                       |
| d-TGA/VSD with overriding and straddling tricuspid valve and RV hypoplasia | 1. Arterial switch operation, PA banding, PFO and VSD closure                                                                                                           |
| DORV, VSD                                                                  | 1. PA banding<br>2. PA band takedown, full repair with right ventricular outflow tract reconstruction, VSD closure, creation of fenestrated ASD, repair tricuspid valve |
| TOF/PS                                                                     | 1. TOF repair                                                                                                                                                           |
| TOF/PS                                                                     | 1. TOF repair                                                                                                                                                           |
| TOF/PS                                                                     | 1. TOF repair                                                                                                                                                           |
| TOF/PS, bilateral SVC                                                      | 1. TOF repair                                                                                                                                                           |
| TOF/PS                                                                     | 1. Balloon dilation of pulmonary valve x 2<br>2. TOF repair                                                                                                             |
| TOF/PS, right arch with aberrant origin of left subclavian                 | 1. TOF repair, division of vascular ring                                                                                                                                |
| TOF/PA with MAPCAs                                                         | 1. Multiple catheterizations to coil MAPCAs and to dilate/stent branch PAs<br>2. RV to PA conduit<br>3. TOF repair with VSD closure and RV to PA conduit replacement    |
| TOF/PA with single large aortopulmonary collateral                         | 1. TOF repair                                                                                                                                                           |
| Complete AV canal                                                          | 1. Complete AV canal repair                                                                                                                                             |
| Balanced transitional AV canal                                             | 1. Partial AV canal repair                                                                                                                                              |
| Truncus arteriosus, AV canal                                               | 1. AV canal and truncus arteriosus repair with canal repair, RV to PA conduit, second ASD closure                                                                       |
| Tricuspid stenosis, mildly hypoplastic RV, PS, VSD                         | 1. Pulmonary valve balloon dilation                                                                                                                                     |
| Dysplastic pulmonary valve                                                 | 1. Resection of pulmonary valve, main PA patch, PDA ligation                                                                                                            |
| Dysplastic pulmonary valve                                                 | 1. PDA ligation, pulmonary arterioplasty                                                                                                                                |
| <b>Class II (Two ventricles with aortic arch obstruction)</b>              |                                                                                                                                                                         |
| Coarctation                                                                | 1. Coarctation repair                                                                                                                                                   |
| VSD, coarctation                                                           | 1. Coarctation repair, VSD and ASD closure                                                                                                                              |
| VSD, coarctation                                                           | 1. VSD and PFO closure, aortic arch augmentation                                                                                                                        |

|                                                              |                                                                                                                                                                                                                    |
|--------------------------------------------------------------|--------------------------------------------------------------------------------------------------------------------------------------------------------------------------------------------------------------------|
| DORV Taussig-Bing type with hypoplastic aortic arch          | 1. Balloon atrial septostomy<br>2. Arterial switch operation, aortic arch repair, VSD closure                                                                                                                      |
| DORV, d-TGA, coarctation                                     | 1. Arterial switch operation, coarctation repair, VSD closure                                                                                                                                                      |
| Interrupted aortic arch with aortopulmonary window           | 1. PA banding<br>2. Full repair with aortopulmonary repair and removal of PA bands                                                                                                                                 |
| Severe AS                                                    | 1. Fetal aortic valvuloplasty<br>2. PFO closure, Ross procedure, repair of ascending aortic aneurysm                                                                                                               |
| Severe AS                                                    | 1. Fetal aortic valvuloplasty<br>2. Postnatal aortic valvotomy                                                                                                                                                     |
| Severe AS with intact atrial septum                          | 1. Fetal aortic valvuloplasty<br>2. Postnatal atrial needle transeptal puncture and aortic valvotomy<br>3. Aortic valve repair, ASD closure, endocardial fibroelastosis resection from LV, PDA ligation            |
| Shone's complex                                              | 1. Balloon dilation of aortic valve                                                                                                                                                                                |
| <b>Class III (single ventricle without arch obstruction)</b> |                                                                                                                                                                                                                    |
| Complex single ventricle physiology                          | 1. Balloon atrial septostomy<br>2. PA banding, atrial septectomy, bidirectional Glenn                                                                                                                              |
| Complex single ventricle physiology                          | 1. Stage 1 Norwood<br>2. Bidirectional Glenn                                                                                                                                                                       |
| Complex single ventricle physiology                          | 1. Postnatal details unavailable                                                                                                                                                                                   |
| Tricuspid atresia type 1B                                    | 1. Right sided modified BT shunt<br>2. Bidirectional Glenn<br>3. Fenestrated Fontan                                                                                                                                |
| Tricuspid atresia type 1C                                    | 1. Right modified BT shunt, PDA ligation, main PA transection with pulmonary valvectomy, oversewing main PA, complete atrial septectomy<br>2. Bidirectional Glenn and BT shunt due to left pulmonary vein stenosis |
| Severe Ebstein's anomaly                                     | 1. Right modified BT shunt<br>2. Bidirectional Glenn                                                                                                                                                               |
| Tricuspid atresia, pulmonary atresia                         | 1. Right modified BT shunt<br>2. Bidirectional Glenn                                                                                                                                                               |
| Unbalanced AV Canal, DORV                                    | 1. PA banding                                                                                                                                                                                                      |
| <b>Class IV (single ventricle with arch obstruction)</b>     |                                                                                                                                                                                                                    |
| HLHS                                                         | 1. Fetal aortic valve dilation<br>2. Atrial septal stent<br>3. Stage 1 Norwood<br>4. Bidirectional Glenn                                                                                                           |
| HLHS                                                         | 1. Stage 1 Norwood<br>2. Bidirectional Glenn                                                                                                                                                                       |
| HLHS                                                         | 1. Stage 1 Norwood<br>2. Bidirectional Glenn                                                                                                                                                                       |
| HLHS                                                         | 1. Stage 1 Norwood<br>2. Bidirectional Glenn                                                                                                                                                                       |
| HLHS                                                         | 1. Stage 1 Norwood<br>2. Bidirectional Glenn                                                                                                                                                                       |
| HLHS with coronary fistula                                   | 1. Stage 1 Norwood<br>2. Bidirectional Glenn                                                                                                                                                                       |
| HLHS with coronary fistula                                   | 1. Stage 1 Norwood<br>2. Bidirectional Glenn                                                                                                                                                                       |
| HLHS, coarctation                                            | 1. Atrial septum dilation<br>2. Stage 1 Norwood                                                                                                                                                                    |

Critical AS with hypoplastic mitral valve and intact atrial septum

1. Stage 1 Norwood, repair of aortic dissection
2. Bidirectional Glenn

d-TGA = d-transposition of the great arteries; d-TGA/IVS = d-TGA with intact ventricular septum; TOF/PS = tetralogy of Fallot with pulmonary stenosis; TOF/PA = tetralogy of Fallot with pulmonary atresia; SVC = superior vena cava; MAPCA = major aortopulmonary collateral; AV = atrioventricular; AS = aortic valve stenosis; HLHS = hypoplastic left heart syndrome; VSD = ventricular septal defect; ASD = atrial septal defect; PDA = patent ductus arteriosus; PFO = patent foramen ovale; PA = pulmonary artery; RV = right ventricle

**Supplemental Table 2. Alternative Hierarchical Regression Models to Predict Neurodevelopmental Outcomes in the CHD Group**

| <b>Outcome</b>      | <b>Variable</b>                | <b>Beta Coefficient<br/>[95% CI]</b> | <b>Partial<br/>Adjusted R<sup>2</sup></b> | <b>Total<br/>Adjusted R<sup>2</sup></b> |
|---------------------|--------------------------------|--------------------------------------|-------------------------------------------|-----------------------------------------|
| Bayley-III          |                                |                                      |                                           |                                         |
| Cognitive composite | Total brain volume (per ml)*   | 0.28 [0.08, 0.48]                    | 0.14                                      | 0.33                                    |
|                     | Stroke or seizure              | 7.33 [-2.81, 17.47]                  | 0.03                                      |                                         |
|                     | Length of stay (per day)       | -0.11 [-0.19, -0.04]                 | 0.21                                      |                                         |
| Language composite  | Education, college or greater† | 8.95 [1.48, 16.42]                   | 0.09                                      | 0.22                                    |
|                     | Total brain volume (per ml)*   | 0.32 [0.04, 0.60]                    | 0.08                                      |                                         |
| Motor composite     | Education, college or greater† | 0.11 [-6.22, 6.45]                   | -0.03                                     | 0.35                                    |
|                     | Cardiac class II               | 1.68 [-5.70, 9.06]                   | 0.07                                      |                                         |
|                     | Cardiac class III              | -8.70 [-17.22, -0.18]                | -                                         |                                         |
|                     | Cardiac class IV               | -4.53 [-13.37, 4.30]                 | -                                         |                                         |

|                          |                                |                       |        |      |
|--------------------------|--------------------------------|-----------------------|--------|------|
|                          | Total brain volume (per ml)*   | 0.29 [0.06, 0.53]     | 0.12   |      |
|                          | Length of stay (per day)       | -0.10 [-0.19, -0.01]  | 0.10   |      |
| Receptive communication  | Education, college or greater† | 1.75 [0.25, 3.24]     | 0.09   | 0.18 |
|                          | Total brain volume (per ml)*   | 0.05 [-0.002, 0.11]   | 0.06   |      |
| Expressive communication | Education, college or greater† | 1.19 [-0.17, 2.54]    | 0.05   | 0.21 |
|                          | Total brain volume (per ml)*   | 0.06 [0.01, 0.12]     | 0.11   |      |
|                          | ECMO                           | -2.61 [-5.71, 0.49]   | 0.04   |      |
| Fine motor               | Total brain volume (per ml)*   | 0.05 [0.003, 0.10]    | 0.08   | 0.26 |
|                          | Birth weight (per kg)          | 0.49 [-0.53, 1.51]    | -0.001 |      |
|                          | Length of stay (per day)       | -0.02 [-0.04, -0.003] | 0.10   |      |
| Gross motor              | Education, college or greater† | 0.24 [-0.85, 1.34]    | -0.01  | 0.40 |
|                          | Cardiac class II               | -0.41 [-1.67, 0.84]   | 0.22   |      |

|                            |                              |                      |      |      |
|----------------------------|------------------------------|----------------------|------|------|
|                            | Cardiac class III            | -2.26 [-3.79, -0.73] | -    |      |
|                            | Cardiac class IV             | -2.22 [-3.61, -0.82] | -    |      |
| <hr/>                      |                              |                      |      |      |
|                            | Total brain volume (per ml)* | 0.06 [0.01, 0.10]    | 0.12 |      |
| <hr/>                      |                              |                      |      |      |
|                            | ECMO                         | -2.71 [-5.24, -0.18] | 0.08 |      |
| <hr/>                      |                              |                      |      |      |
| ABAS-3                     |                              |                      |      |      |
| General adaptive composite | Total brain volume (per ml)* | 0.49 [0.22, 0.76]    | 0.21 | 0.21 |

\*Total brain volume refers to residual after adjustment of fetal total brain volume for sex and gestational age (linear and quadratic terms)

†Education refers to primary caregiver education

ECMO = extracorporeal membrane oxygenation

Bayley-III = Bayley Scales of Infant Development, Third Edition

ABAS-3 = Adaptive Behavior Assessment System, Third Edition

**Supplemental Table 3. Stepwise Forward Selection Regression Models to Predict Neurodevelopmental Outcomes in the CHD Group**

| <b>Outcome</b>      | <b>Variable</b>                | <b>Beta Coefficient<br/>[95% CI]</b> | <b>Partial<br/>Adjusted R<sup>2</sup></b> | <b>Total<br/>Adjusted R<sup>2</sup></b> |
|---------------------|--------------------------------|--------------------------------------|-------------------------------------------|-----------------------------------------|
| <b>Bayley-III</b>   |                                |                                      |                                           |                                         |
| Cognitive composite | Total brain volume (per ml)*   | 0.27 [0.08, 0.48]                    | 0.14                                      | 0.33                                    |
|                     | Length of stay (per day)       | -0.11 [-0.19, -0.04]                 | 0.21                                      |                                         |
|                     | Stroke or seizure              | 7.33 [-2.81, 17.47]                  | 0.03                                      |                                         |
| <hr/>               |                                |                                      |                                           |                                         |
| Language Composite  | Total brain volume (per ml)*   | 0.32 [0.04, 0.60]                    | 0.08                                      | 0.22                                    |
|                     | Education, college or greater† | 8.95 [1.48, 16.42]                   | 0.09                                      |                                         |
| <hr/>               |                                |                                      |                                           |                                         |
| Motor Composite     | Total brain volume (per ml)*   | 0.29 [0.07, 0.52]                    | 0.13                                      | 0.37                                    |
|                     | Cardiac class II               | 1.67 [-5.60, 8.94]                   | 0.07                                      |                                         |
|                     | Cardiac class III              | -8.71 [-17.09, -0.34]                | -                                         |                                         |
|                     | Cardiac class IV               | -4.55 [-13.22, 4.12]                 | -                                         |                                         |



|                          |                                |                       |      |      |
|--------------------------|--------------------------------|-----------------------|------|------|
|                          | Length of stay (per day)       | -0.10 [-0.19, -0.01]  | 0.10 |      |
| Receptive communication  | Total brain volume (per ml)*   | 0.05 [-0.002, 0.11]   | 0.06 | 0.18 |
|                          | Education, college or greater† | 1.75 [0.25, 3.25]     | 0.09 |      |
| Expressive communication | Total brain volume (per ml)*   | 0.09 [0.04, 0.15]     | 0.18 | 0.18 |
|                          | Birth weight                   | -0.71 [-1.85, 0.42]   | 0.05 |      |
|                          | ECMO                           | -2.95 [-6.09, 0.18]   | 0.01 |      |
| Fine motor               | Total brain volume (per ml)*   | 0.06 [0.01, 0.10]     | 0.12 | 0.26 |
|                          | LOS                            | -0.02 [-0.04, -0.005] | 0.11 |      |
| Gross motor              | Total brain volume (per ml)*   | 0.06 [0.02, 0.10]     | 0.15 | 0.45 |
|                          | White race                     | 1.39 [0.09, 2.70]     | 0.08 |      |
|                          | Cardiac class II               | -0.44 [-1.62, 0.75]   | 0.25 |      |
|                          | Cardiac class III              | -2.53 [-3.99, -1.06]  | -    |      |

|                            |                              |                      |      |      |
|----------------------------|------------------------------|----------------------|------|------|
|                            | Cardiac class IV             | -1.98 [-3.32, -0.64] | -    |      |
|                            | ECMO                         | -3.12 [-5.54, -0.71] | 0.12 |      |
| ABAS-3                     |                              |                      |      |      |
| General adaptive composite | Total brain volume (per ml)* | 0.49 [0.22, 0.76]    | 0.21 | 0.21 |
